# Supplementary material
Source: HighWire-hosted journal article supplement (https://ajnr-sso.highwirestaging.com/highwire/filestream/52168/field_highwire_adjunct_files/0/2440_table.pdf)
Supplement: 2440_table.pdf [file 2440_table.pdf]

| On-line Table: Relationships between the degree of microcephaly and other MR findings |     |                             |     |               |     |                    |     |                              |     |                       |     |                   |     |
|---------------------------------------------------------------------------------------|-----|-----------------------------|-----|---------------|-----|--------------------|-----|------------------------------|-----|-----------------------|-----|-------------------|-----|
| Micro-<br>cephaly                                                                     | No. | Simplified<br>Gyral Pattern | No. | WM Volume     | No. | Corpus<br>Callosum | No. | Posterior Fossa<br>Structure | No. | Myelination           | No. | BG and<br>Thalami | No. |
| Mild                                                                                  | 7   | Normal gyri                 | 2   | Mild loss     | 2   | Normal             | 3   | Disproportionally large      | 1   | Normal WM             | 5   | Normal            | 3   |
|                                                                                       |     | Mildly simplified           | 4   | Moderate loss | 10  | Hypoplastic        | 4   | Proportionally small         | 5   | Delayed myelination   | 0   | Small             | 4   |
|                                                                                       |     | Moderately simplified       | 0   | Severe loss   | 4   | Hypogenetic        | 0   | Disproportionally small      | 1   | Abnormal WM intensity | 2   | Dysmorphic        | 0   |
|                                                                                       |     | Severely simplified         | 1   |               |     | Absent             | 0   | Could not assess             | 0   | Could not assess      | 0   | Could not assess  | 0   |
|                                                                                       |     |                             |     |               |     | Could not assess   | 0   |                              |     |                       |     |                   |     |
| Moderate                                                                              | 42  | Normal gyri                 | 9   | Mild loss     | 4   | Normal             | 16  | Disproportionally large      | 12  | Normal WM             | 27  | Normal            | 30  |
|                                                                                       |     | Mildly simplified           | 24  | Moderate loss | 21  | Hypoplastic        | 16  | Proportionally small         | 20  | Delayed myelination   | 14  | Small             | 10  |
|                                                                                       |     | Moderately simplified       | 8   | Severe loss   | 27  | Hypogenetic        | 8   | Disproportionally small      | 10  | Abnormal WM intensity | 1   | Dysmorphic        | 2   |
|                                                                                       |     | Severely simplified         | 1   |               |     | Absent             | 2   | Could not assess             | 0   | Could not assess      | 0   | Could not assess  | 0   |
|                                                                                       |     |                             |     |               |     | Could not assess   | 0   |                              |     |                       |     |                   |     |
| Severe                                                                                | 70  | Normal gyri                 | 5   | Mild loss     | 1   | Normal             | 9   | Disproportionally large      | 41  | Normal WM             | 45  | Normal            | 49  |
|                                                                                       |     | Mildly simplified           | 18  | Moderate loss | 11  | Hypoplastic        | 39  | Proportionally small         | 20  | Delayed myelination   | 18  | Small             | 16  |
|                                                                                       |     | Moderately simplified       | 20  | Severe loss   | 39  | Hypogenetic        | 13  | Disproportionally small      | 8   | Abnormal WM intensity | 2   | Dysmorphic        | 3   |
|                                                                                       |     | Severely simplified         | 27  |               |     | Absent             | 3   | Could not assess             | 1   | Could not assess      | 5   | Could not assess  | 2   |
|                                                                                       |     |                             |     |               |     | Could not assess   | 6   |                              |     |                       |     |                   |     |
